# Supplementary material for: Lithiated polymer coating for interface stabilization in Li6PS5Cl-based solid-state batteries with high-nickel NCM
Source: Royal Society of Chemistry journal article supplement (doi:10.1039/d4ta07265k), 2024-11-28
Supplement: d4ta07265k1.pdf [file d4ta07265k1.pdf]

## Supporting Information

### Lithiated Polymer Coating for Interface Stabilization in Li<sub>6</sub>PS<sub>5</sub>Cl-Based Solid-State Batteries with High-Nickel NCM

Bing-Xuan Shi,<sup>a</sup> Franjo Weber,<sup>b</sup> Yuriy Yusim,<sup>a</sup> Thomas Demuth,<sup>c</sup> Kilian Vettori,<sup>a</sup> Andreas Münchinger,<sup>d</sup> Giorgi Titvinidze,<sup>d,e</sup> Kerstin Volz,<sup>c</sup> Anja Henss,<sup>a</sup> Rüdiger Berger,<sup>b</sup> Felix H. Richter<sup>\*a</sup>

<sup>a</sup> Institute of Physical Chemistry & Center for Materials Research (LaMa), Justus-Liebig-University Giessen, Heinrich-Buff-Ring 17, 35392 Giessen, Germany

<sup>b</sup> Max Planck Institute for Polymer Research, Ackermannweg 10, 55128, Mainz, Germany.

<sup>c</sup> Department of Physics & Materials Sciences Center (WZMW), Philipps-University Marburg, Hans-Meerwein Straße 6, 35032 Marburg, Germany.

<sup>d</sup> Hahn-Schickard, Georges-Köhler-Allee 103, 79110 Freiburg, Germany

<sup>e</sup> Agricultural University of Georgia, 240 David Aghmashenebeli Alley, 0131 Tbilisi, Georgia

\* Corresponding author, Felix.H.Richter@phys.chemie.uni-giessen.de

**Keywords:** Solid-state batteries, polymer coating, cathode, solid electrolyte, interface degradation, polyanion

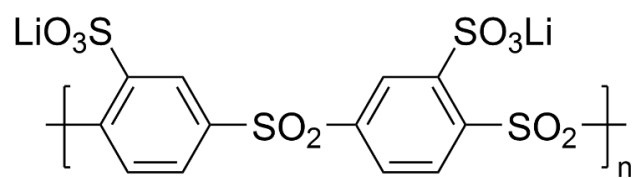

**Figure S1.** Chemical structure of sulfonated poly(phenylene sulfone) in its lithiated form (sPPSLi).

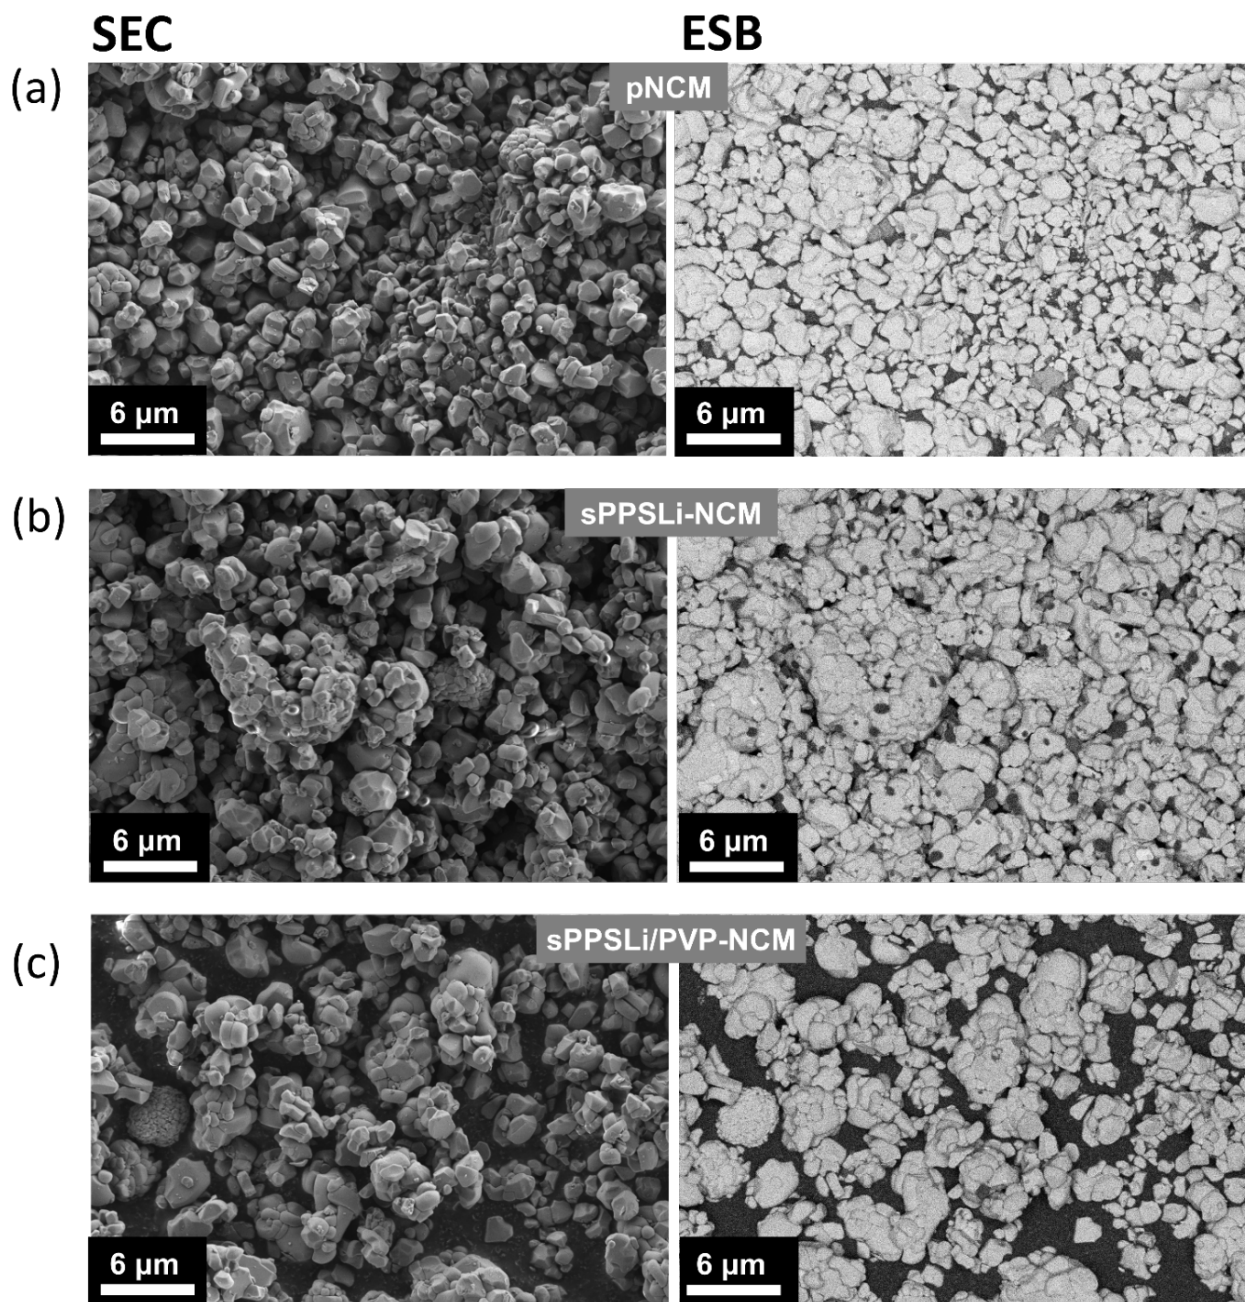

**Figure S2.** SEM analysis of (a) pNCM, (b) sPPSLi-NCM, and (c) sPPSLi/PVP-NCM with secondary electron images (SEC) shown on the left and energy-selective backscattered electron images (ESB) shown on the right. (Interpretation: sPPSLi-NCM shows some polymer particle aggregation on the surface of NCM, which is evident as dark spots visible in the ESB image of sPPSLi-NCM; in contrast, sPPSLi/PVP-NCM and pNCM show no polymer particles, suggesting that the sPPSLi/PVP-NCM is coated uniformly.)

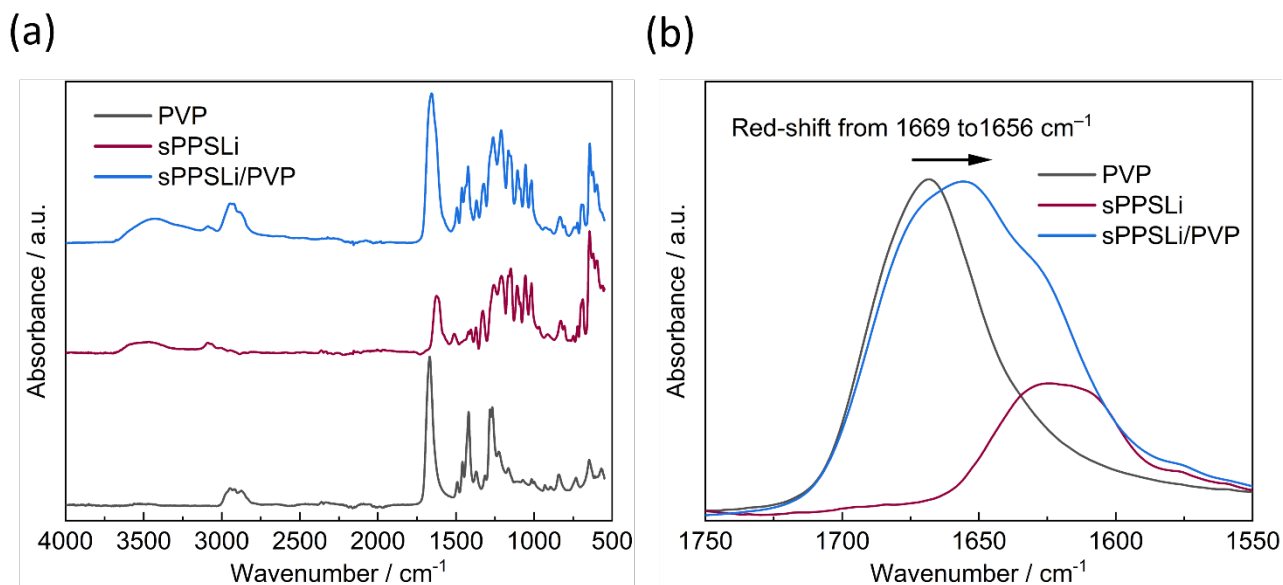

**Figure S3.** (a) FT-IR spectra of PVP, sPPSLi, and sPPSLi/PVP mixture with 1:1 weight ratio (96 scans each). (b) Magnification of the image in (a) to focus on the region with 1550  $\text{cm}^{-1}$  to 1750  $\text{cm}^{-1}$  wavenumber. (Interpretation: this region corresponds to the C=O bond. The electrostatic interaction between PVP and sPPSLi is evident from the red-shift observed in the C=O stretching frequency, moving from 1669  $\text{cm}^{-1}$  to 1656  $\text{cm}^{-1}$ .)

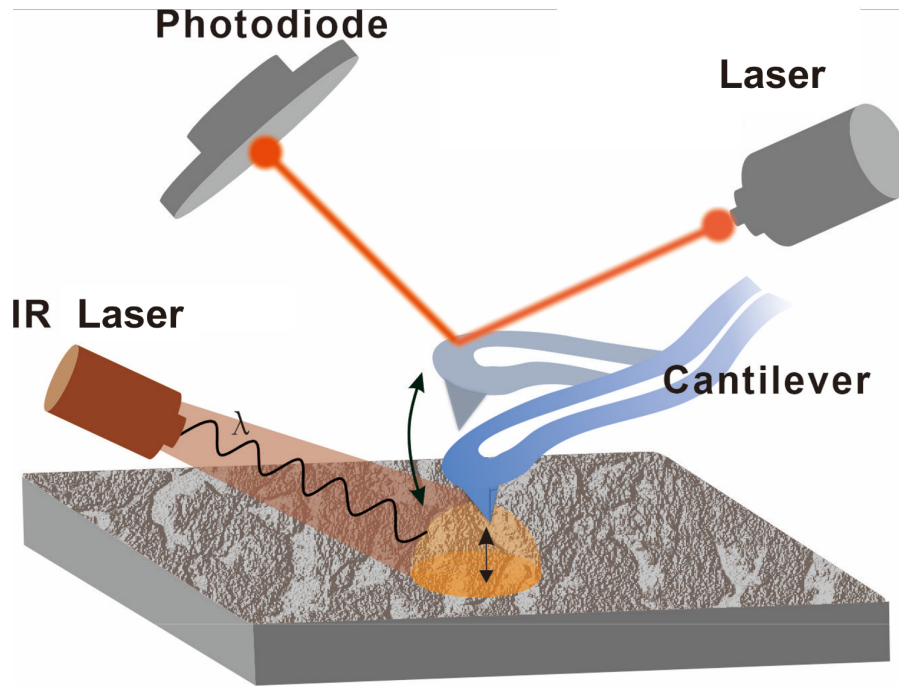

**Figure S4.** Schematic of the working principle of nano-infrared microscopy (nano-IR).

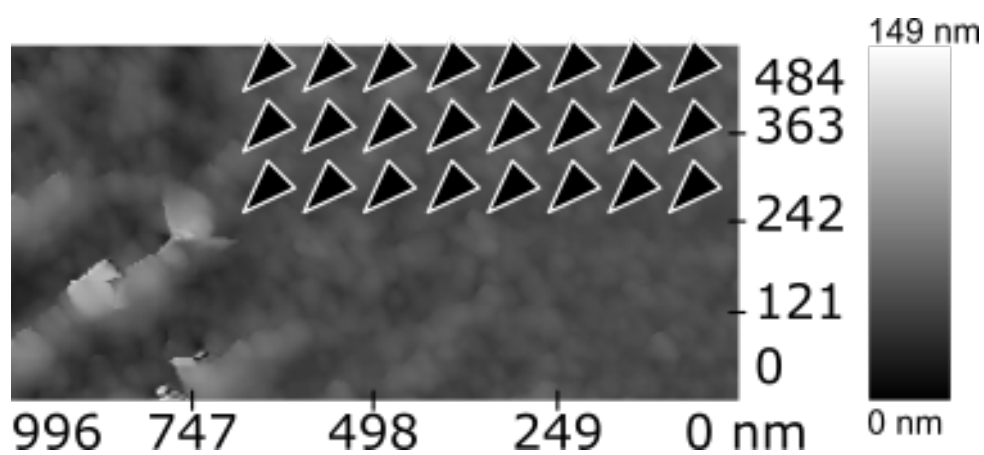

**Figure S5.** Topography of the sPPSLi/PVP polymer film with positions where photo-induced force microscopy was performed (black triangles). The sPPSLi/PVP polymer film is prepared by pressing sPPSLi/PVP powder into a pellet.

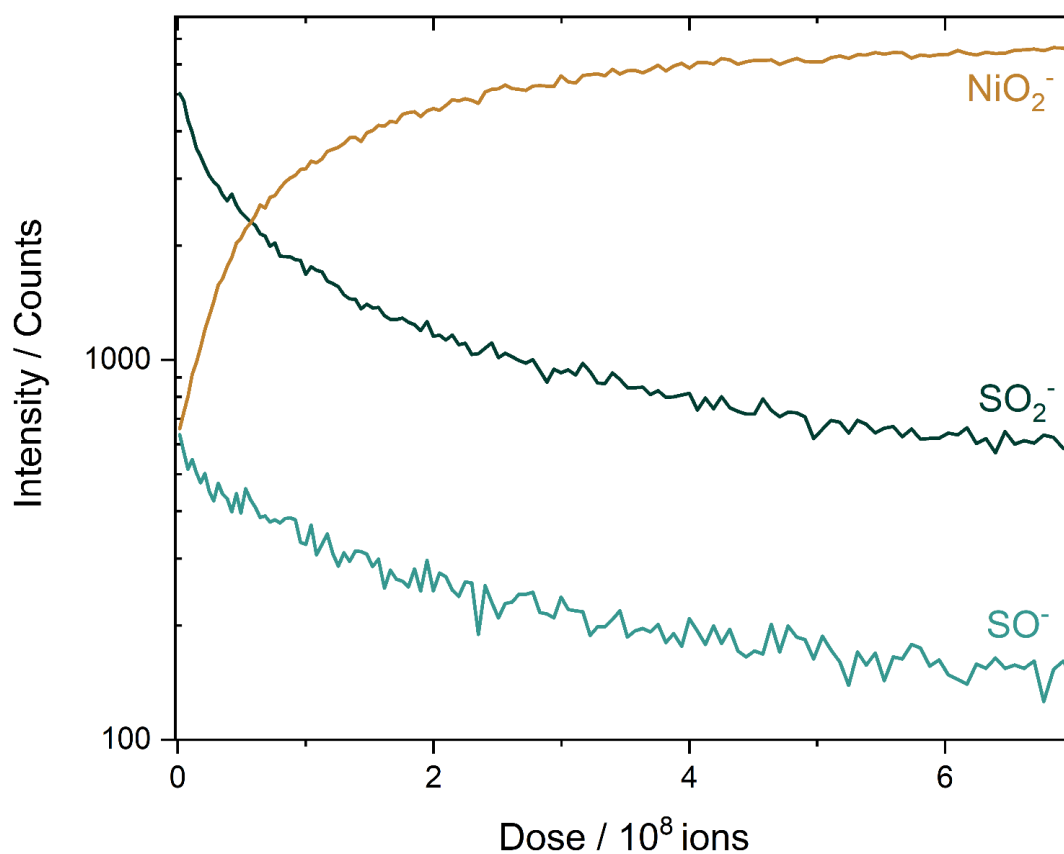

**Figure S6.** ToF-SIMS depth profiles of sPPSLi/PVP-NCM following the SO<sub>2</sub><sup>-</sup>, SO<sup>-</sup>, and NiO<sub>2</sub><sup>-</sup> fragments. (Interpretation: the SO<sub>2</sub><sup>-</sup> and SO<sup>-</sup> signals decrease, and the NiO<sub>2</sub><sup>-</sup> signal increases when analyzing the surface in the imaging mode with Bi<sup>3+</sup> as primary ions (0.1 pA). This indicates that the polymer is gradually removed from the surface of the sPPSLi/PVP-NCM particles during the measurement.)

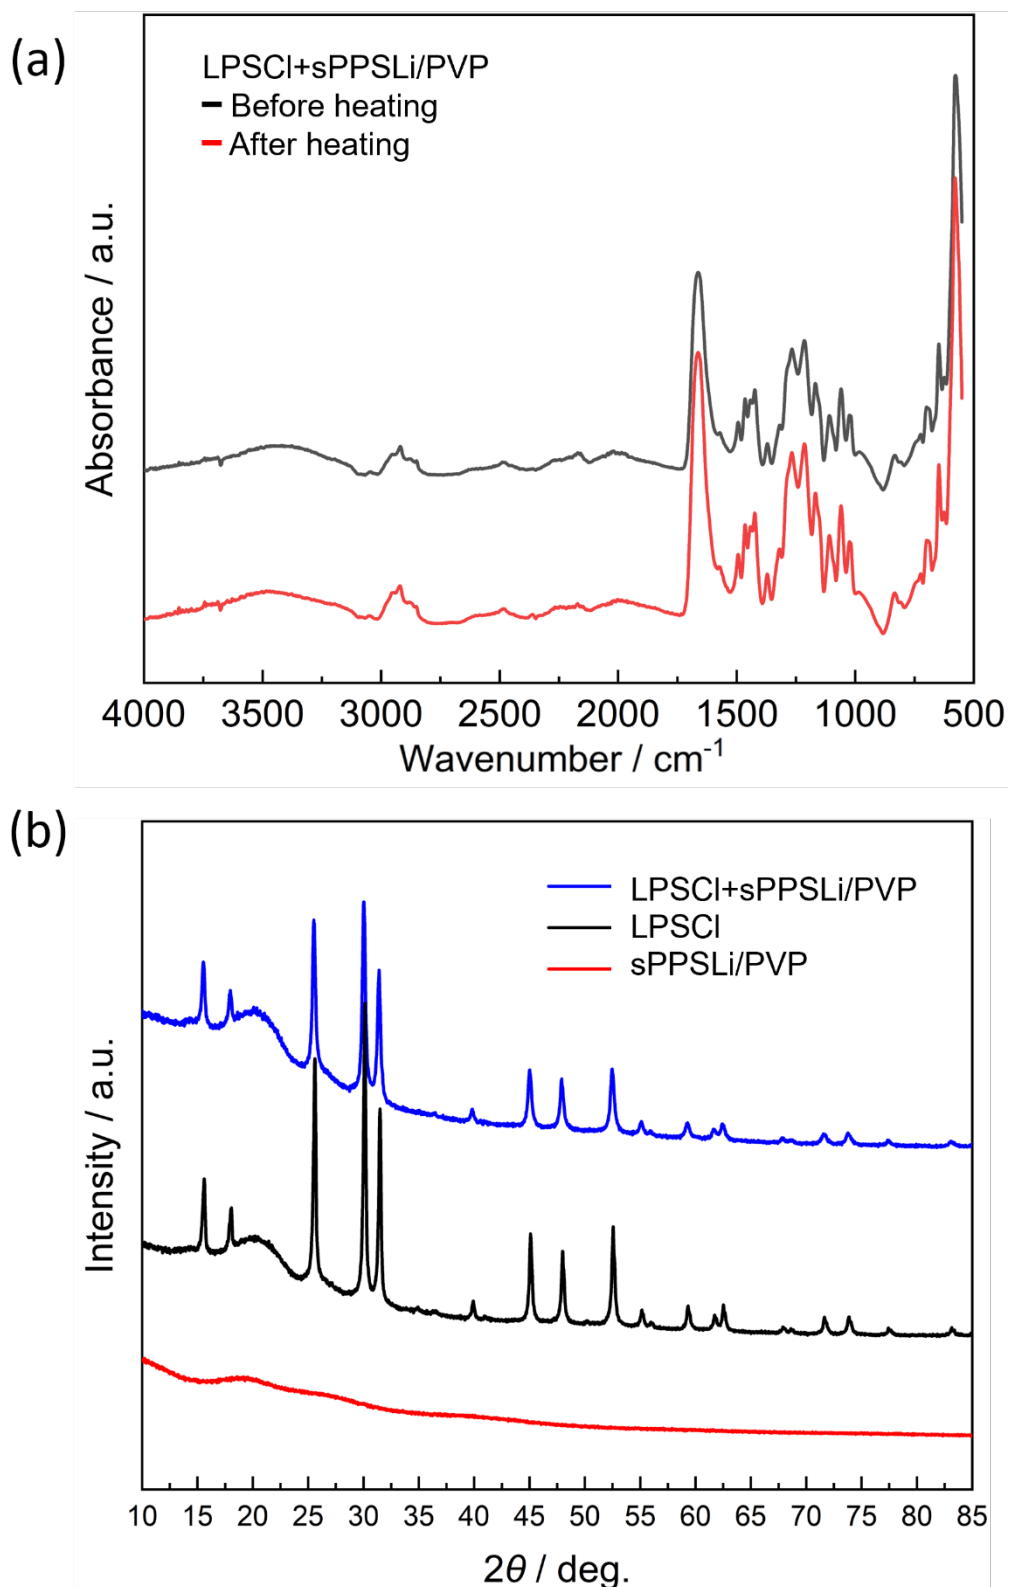

**Figure S7.** (a) FT-IR of  $\text{Li}_6\text{PS}_5\text{Cl}$  mixed with sPPSLi/PVP polymer complex shows no difference before and after heating in a vacuum chamber at 80 °C for 24 hours. (b) XRD patterns of sPPSLi/PVP mixed with  $\text{Li}_6\text{PS}_5\text{Cl}$  after heating at 80 °C for 24 hours also match the reflections of  $\text{Li}_6\text{PS}_5\text{Cl}$  before heating. In addition, sPPSLi/PVP is shown to be amorphous.



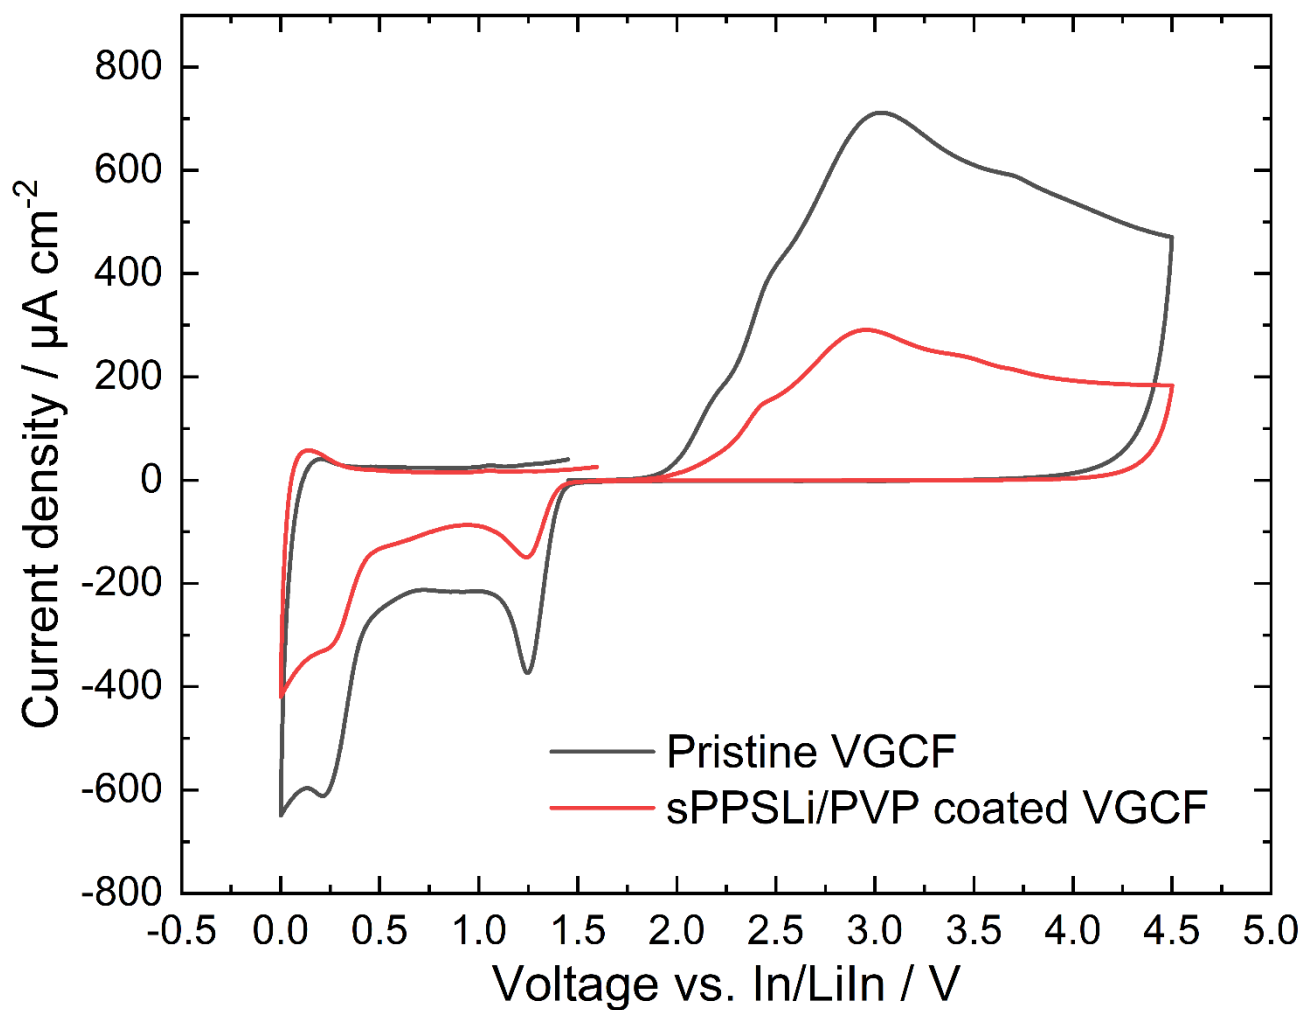

**Figure S8.** The electrochemical stability window is measured by cyclic voltammetry for the range of 0 V to 4.5 V (vs. In/LiIn) with a scan rate of  $1 \text{ mV s}^{-1}$ , initiating from the open circuit potential. The electrochemical cell was constructed using VGCF/ $\text{Li}_6\text{PS}_5\text{Cl}$  composite as the working electrode,  $\text{Li}_6\text{PS}_5\text{Cl}$  as the separator, and an indium-lithium alloy as the counter electrode.

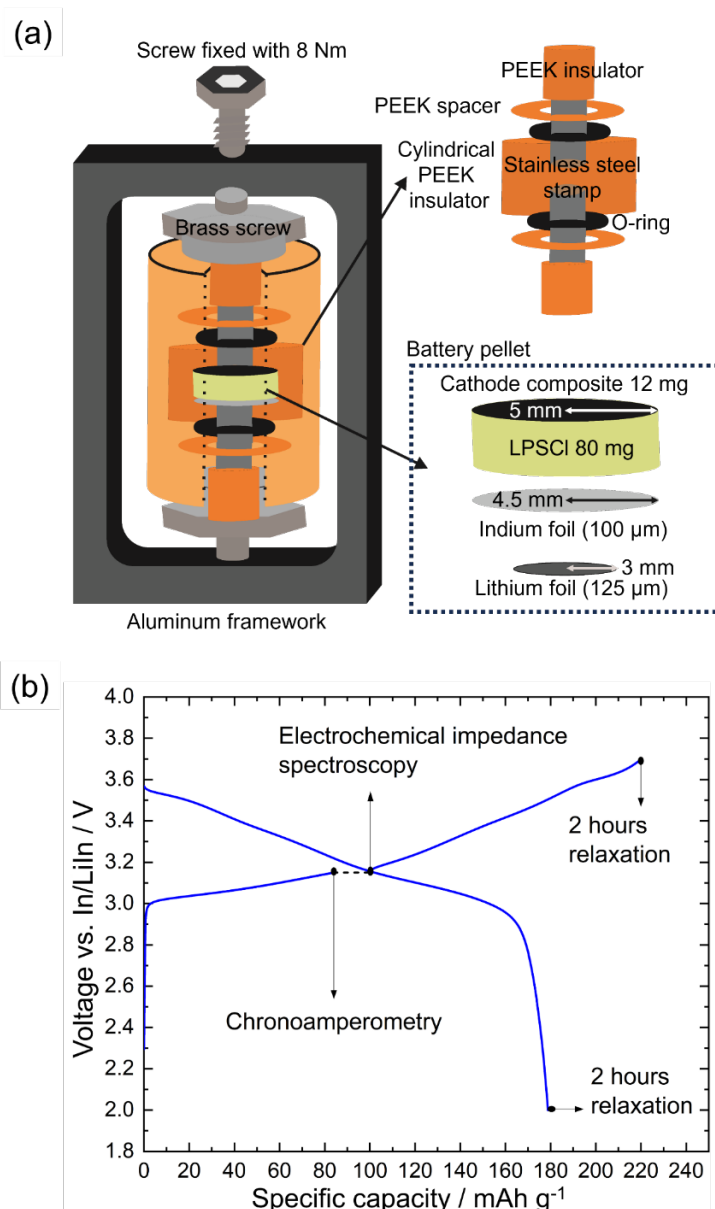

**Figure S9.** (a) Schematic illustrating the cell casing and the architecture of the SEB pellet. The SEB pellet comprises 12 mg of cathode composite, 80 mg of  $\text{Li}_6\text{PS}_5\text{Cl}$  solid electrolyte separator, 9 mm in diameter of indium foil, and 6 mm in diameter of lithium foil, all compacted within a PEEK cylinder. Stainless steel terminals serve as current collectors, while O-rings ensure the SEB pellet remains airtight and protected from external air. (b) Schematic of performed electrochemical analysis. SEBs are initially galvanostatically charged to 3.15 V (vs. In/LiIn). They are held at this potential until the current decreases to below 2% (chronoamperometry). Following this, EIS measurements are taken from 1 MHz to 100  $\mu\text{Hz}$ . EIS sinusoidal amplitudes are set at 10 mV (from 1 MHz to 10 mHz), 5 mV (from 10 mHz to 1 mHz), and finally 3 mV (from 1 mHz to 100  $\mu\text{Hz}$ ). The SEBs are then galvanostatically charged to 3.7 V (vs. In/LiIn), followed by a 2-hour relaxation period. Finally, they are discharged to 2.0 V (vs. In/LiIn) and then undergo another 2-hour relaxation period. The relaxation periods are required for the active mass calculation.

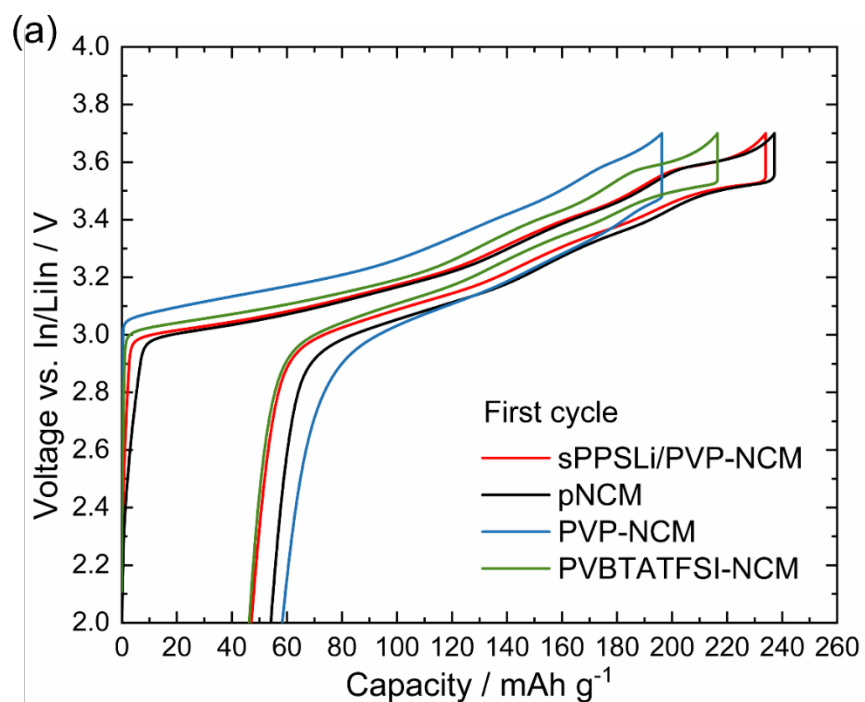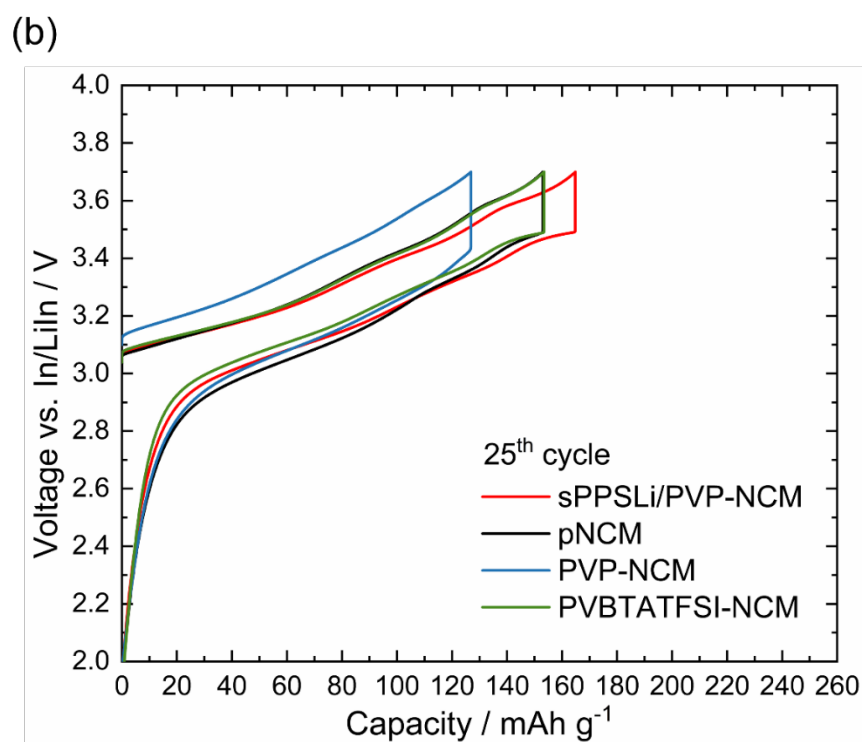

**Figure S10.** Charge/discharge curves of the (a) first and (b) 25<sup>th</sup> cycle at 0.1C.

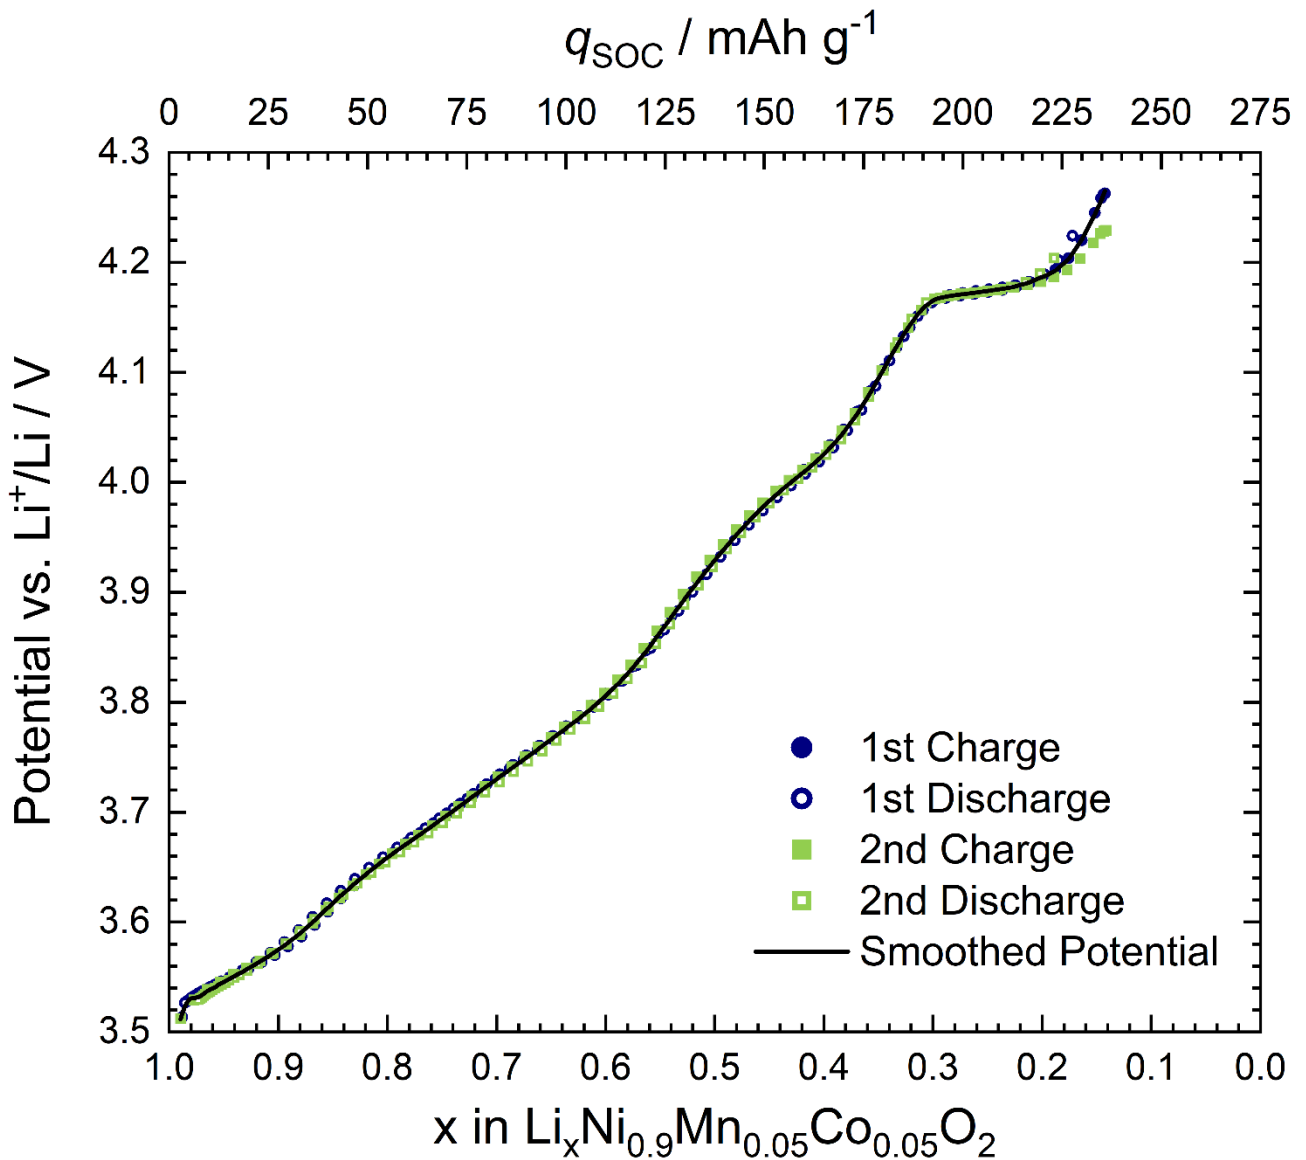

**Figure S11.** Illustration of the relationship between the open circuit voltage (OCV) (vertical axis) and the state of charge (SOC), represented by the  $\text{Li}^+$  content  $x$  in  $\text{Li}_x\text{Ni}_{0.9}\text{Mn}_{0.05}\text{Co}_{0.05}\text{O}_2$  (horizontal axis). This relationship is derived from galvanostatic charge-discharge cycles of a  $\text{LiLEB}^{\text{NCM}}$  at a rate of 0.1C. Every 10-minute interval of charging or discharging is followed by a two-hour relaxation period to measure the OCV. Using the known time and current to obtain the amount of charge per GITT pulse step, we can calculate  $x$  in  $\text{Li}_x\text{Ni}_{0.9}\text{Mn}_{0.05}\text{Co}_{0.05}\text{O}_2$ .

**Table S1.** Fitting of impedance data of  $\text{LiInSEB}^{\text{pNCM}}$  and  $\text{LiInSEB}^{\text{sPPSLi/PVP-NCM}}$  at 25 °C using the transition line model.

$\text{LiInSEB}^{\text{pNCM}}$

| <b>Cycle number</b>                        | <b>1</b> | <b>2</b> | <b>52</b> | <b>102</b> | <b>152</b> |
|--------------------------------------------|----------|----------|-----------|------------|------------|
| $R_{\text{cathode}} / \Omega \text{ cm}^2$ | 18.5     | 34.7     | 124.2     | 150.5      | 203.4      |
| $R_{\Omega} / \Omega \text{ cm}^2$         | 33.8     | 37.1     | 41.0      | 44.1       | 54.6       |
| $R_{\text{anode}} / \Omega \text{ cm}^2$   | 6.8      | 1.5      | 15.7      | 27.3       | 37.7       |

$\text{LiInSEB}^{\text{sPPSLi/PVP-NCM}}$

| <b>Cycle number</b>                        | <b>1</b> | <b>2</b> | <b>52</b> | <b>102</b> | <b>152</b> |
|--------------------------------------------|----------|----------|-----------|------------|------------|
| $R_{\text{cathode}} / \Omega \text{ cm}^2$ | 26.4     | 35.2     | 69.7      | 90.3       | 110.4      |
| $R_{\Omega} / \Omega \text{ cm}^2$         | 33.0     | 33.0     | 46.3      | 46.3       | 39.3       |
| $R_{\text{anode}} / \Omega \text{ cm}^2$   | 2.9      | 1.8      | 26.6      | 25.7       | 31.4       |

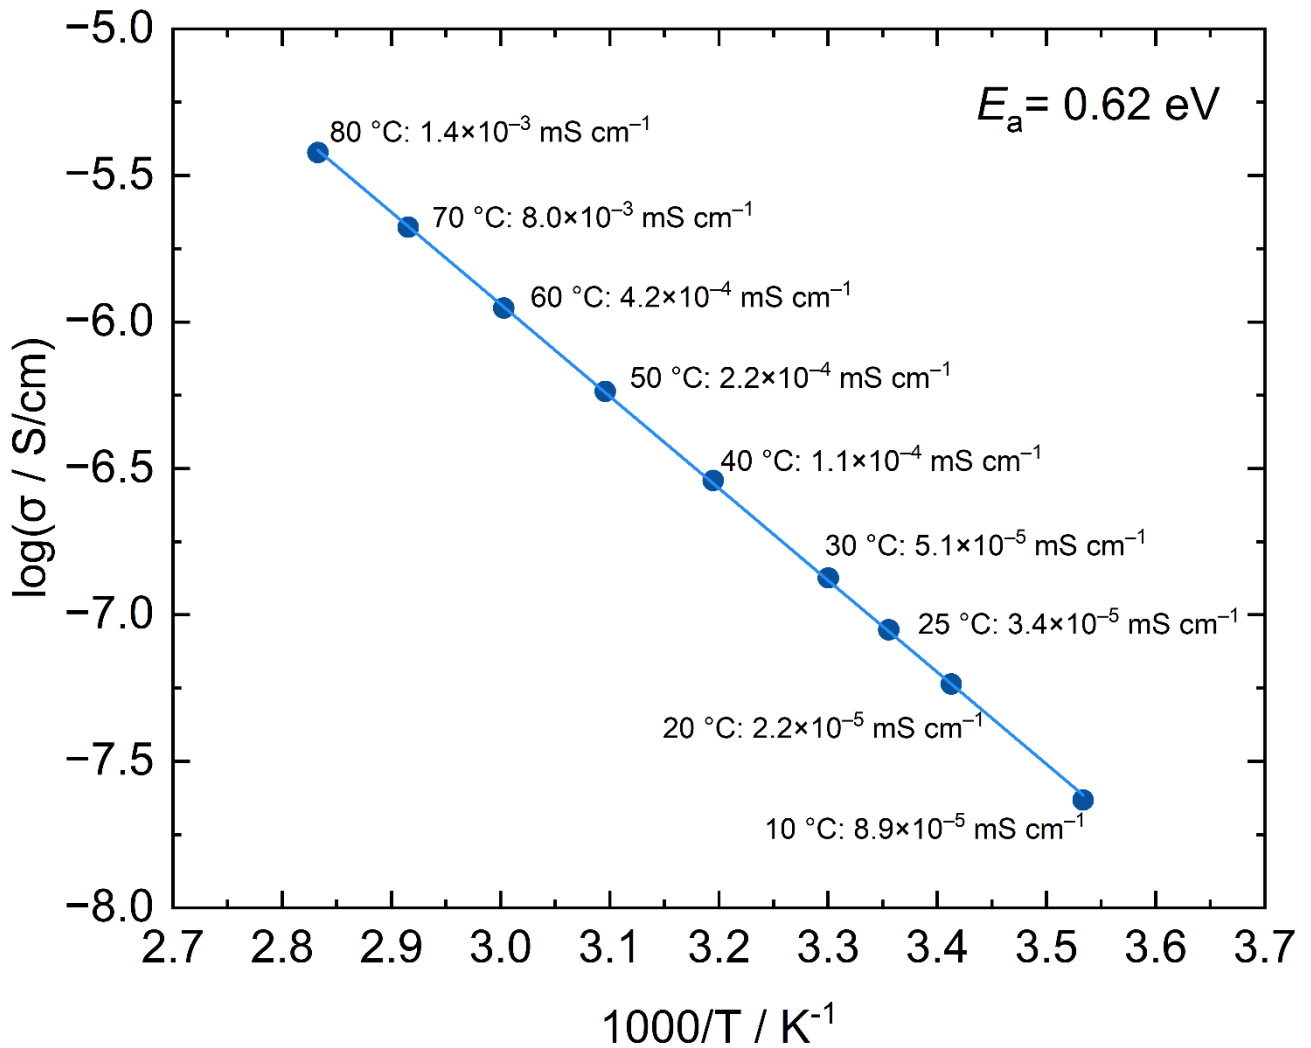

**Figure S12.** Arrhenius plot of conductivity of the sPPLi/PVP polymer complex obtained by compressing sPPLi/PVP into a pellet and applying a platinum sputter coating on both sides. The activation energy ( $E_a = 0.62$  eV) is calculated by the slope of the  $\log(\sigma / \text{S/cm})$  vs  $1000/T / \text{K}^{-1}$ , following the Arrhenius equation:  $\sigma = \sigma_0 \cdot e^{-E_a/kT}$ .  $\sigma$  is the conductivity measured by EIS.  $\sigma_0$  is the pre-exponential factor.  $E_a$  is the activation energy.  $k$  is the Boltzmann constant  $8.617 \cdot 10^{-5}$  eV/K.  $T$  is the temperature.
